# Supplementary material for: Well-defined gold nanoparticle@N-doped porous carbon prepared from metal nanoparticle@metal–organic frameworks for electrochemical sensing of hydrazine
Source: Royal Society of Chemistry journal article supplement (doi:10.1039/c6ra00096g), 2016-01-01
Supplement: c6ra00096g1.pdf [file c6ra00096g1.pdf]

## Supplementary materials

**Well-defined gold nanoparticles@N-doped porous carbon prepared from metal nanoparticles@metal–organic frameworks for electrochemical sensing of hydrazine**

Juan Yang, Faqiong Zhao, Baizhao Zeng\*

Key Laboratory of Analytical Chemistry for Biology and Medicine (Ministry of Education), College of Chemistry and Molecular Sciences, Wuhan University, Wuhan 430072, Hubei Province, P. R. China

Corresponding Author:

\* Tel: 86-27-68752701; Fax: 86-27-68754067;

\*E-mail address: bzzeng@whu.edu.cn

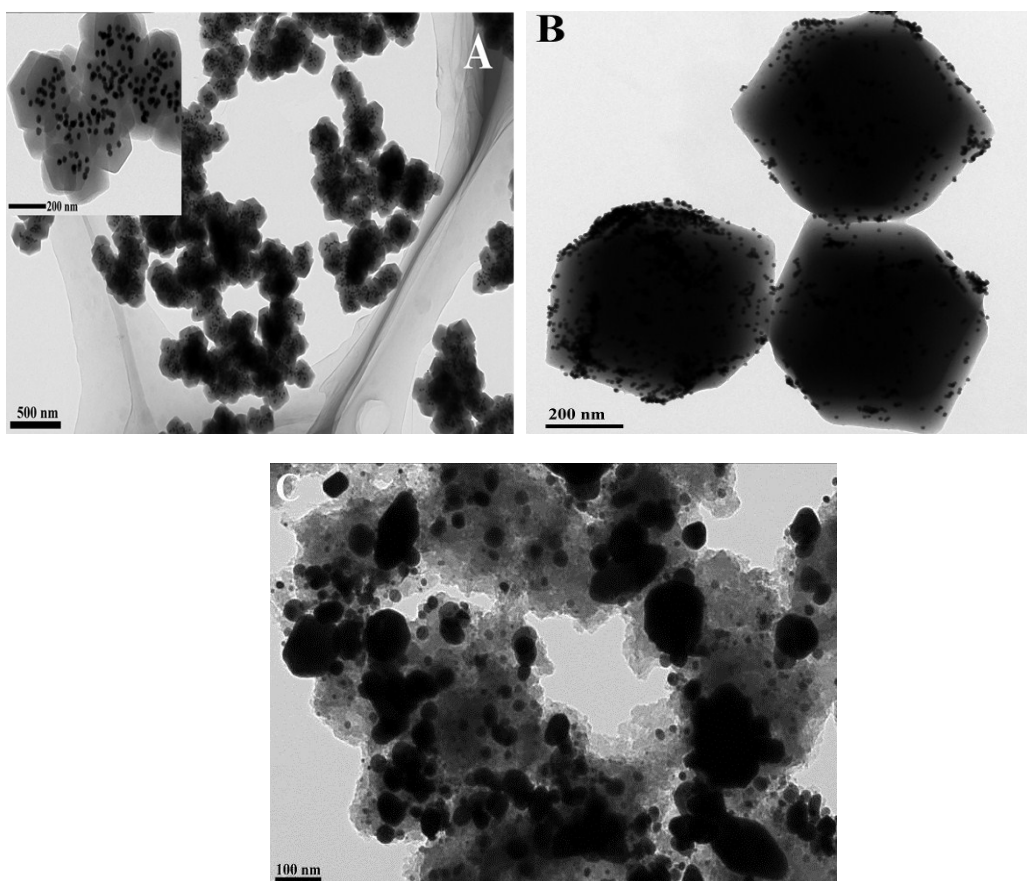

**Figure S1.** TEM images of large visual scale of Au@ZIF-8-2 (A), Au-ZIF-8 (B) and Au/NPC-700 (C). Inset: the amplification map of Au@ZIF-8-2.

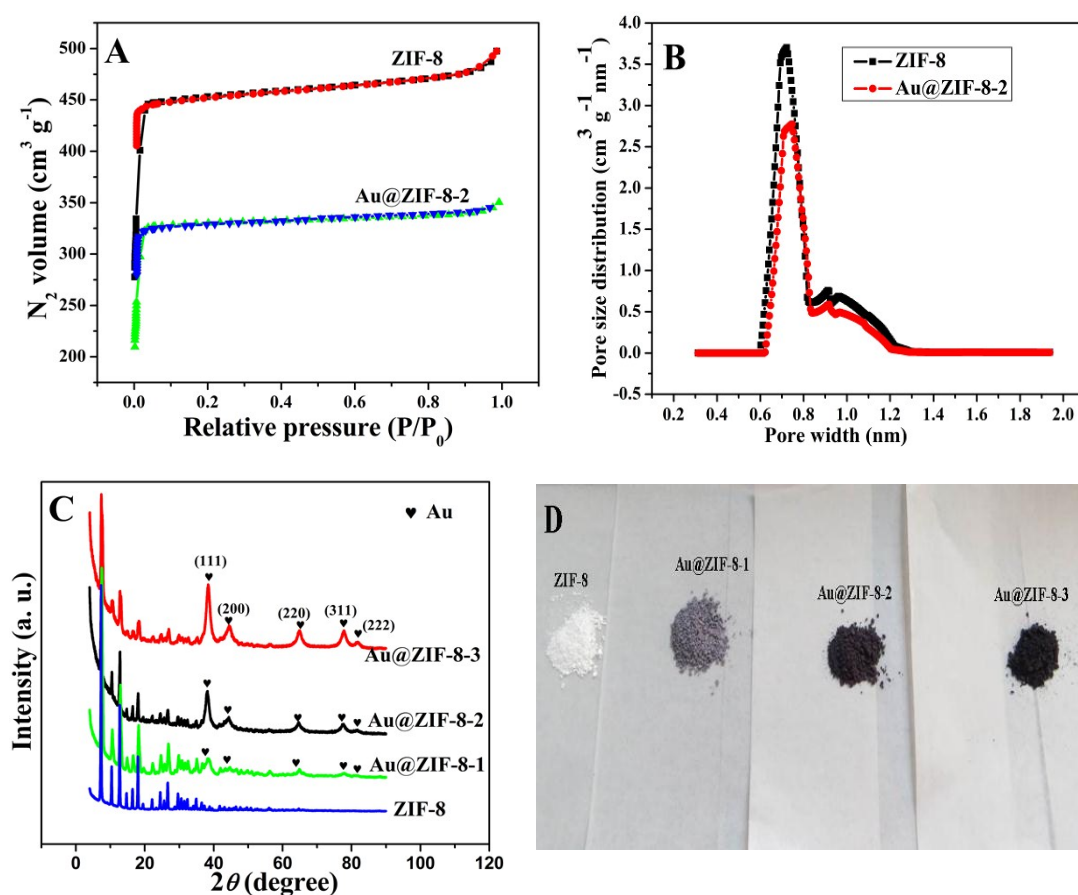

**Figure S2.** Nitrogen-sorption isotherms (A) and corresponding pore-size distributions (B) for ZIF-8 and Au@ZIF-8-2; XRD patterns of ZIF-8, Au@ZIF-8-1, Au@ZIF-8-2, Au@ZIF-8-3 (C) and corresponding photographs of them (D, from left to right).

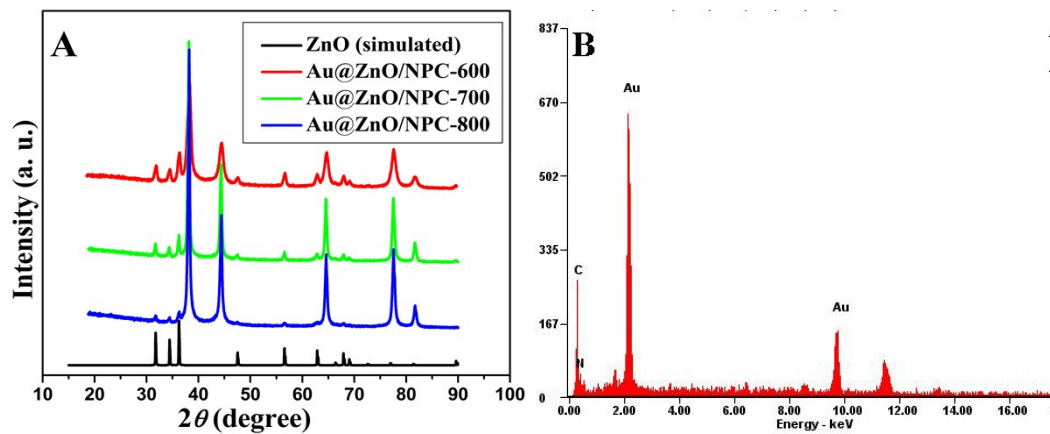

**Figure S3.** XRD patterns of simulated ZnO, Au@ZnO/NPC-800, Au@ZnO/NPC-700 and Au@ZnO/NPC-600 (A, from bottom to up), EDX spectrum of Au@NPC-700 (B).

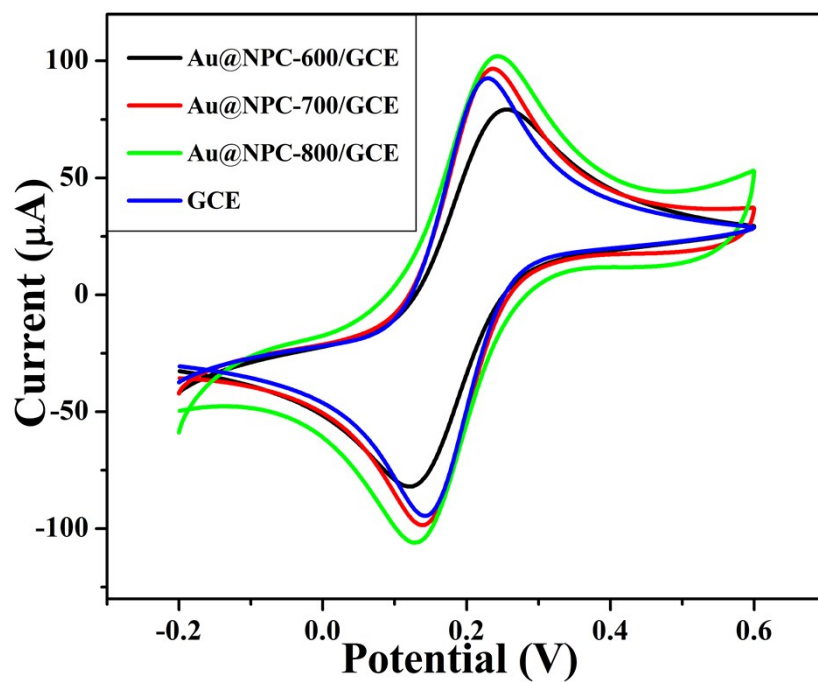

**Figure S4.** CVs of Au@NPC-800/GCE, Au@NPC-700/GCE, bare GCE and Au@NPC-600/GCE (from top to bottom) in 5.0 mM  $\text{K}_3\text{Fe}(\text{CN})_6$ - $\text{K}_4\text{Fe}(\text{CN})_6$  containing 0.1 M KCl. Scan rate: 50 mV/s.

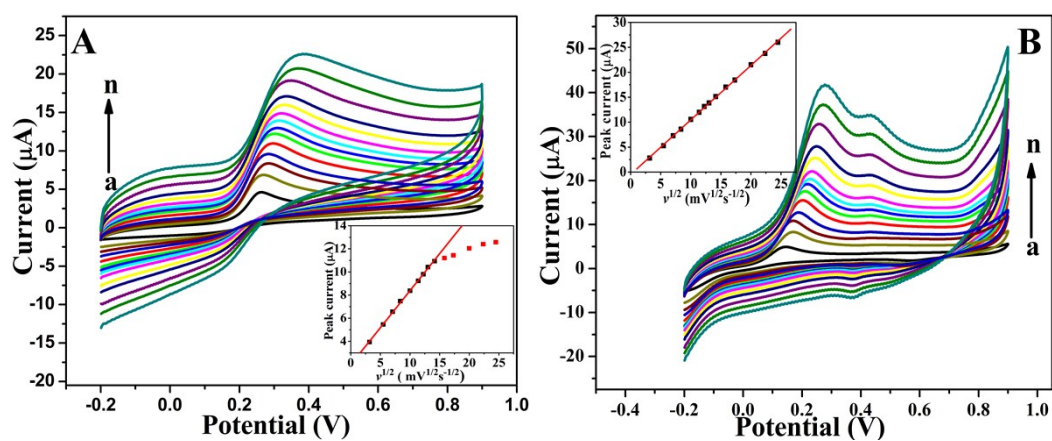

**Figure S5.** Influence of scan rate on peak current of Au@NPC-700/GCE (A) and PVP-stabilized Au/GCE (B). Scan rate (from a to n): 10, 30, 50, 70, 100, 130, 150, 170, 200, 250, 300, 400, 500 and 600  $\text{mV s}^{-1}$ . Hydrazine concentration: 0.1 mM. The insets were plots of peak current vs  $v^{1/2}$ .

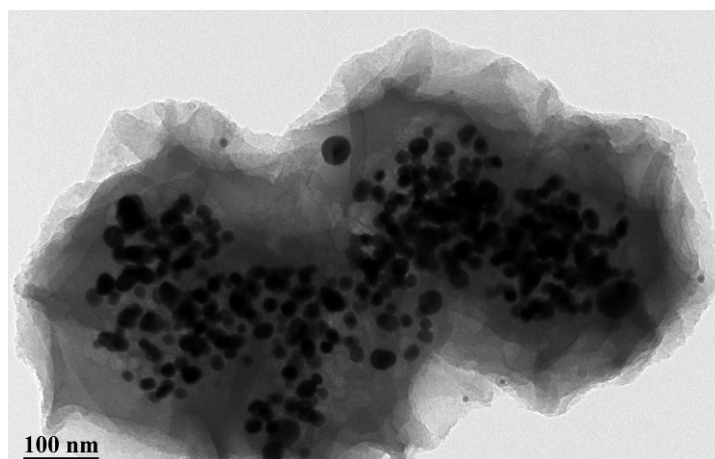

**Figure S6.** TEM image of the Au@NPC-700 after five cycles of electrochemical measurement.

**Table S1** Au NPs size, surface area, total pore volume and Au content of  
Au@NPC-x (x=600, 700 and 800)

| Sample     | Au NPs size<br>(nm) | Surface area<br>(m <sup>2</sup> g <sup>-1</sup> ) | Pore volume<br>(cm <sup>3</sup> g <sup>-1</sup> ) | Au content (at<br>%) |
|------------|---------------------|---------------------------------------------------|---------------------------------------------------|----------------------|
| Au@NPC-600 | 15-25               | 10.51                                             | 0.038                                             | 0.43                 |
| Au@NPC-700 | 25-40               | 146.52                                            | 0.212                                             | 0.56                 |
| Au@NPC-800 | 30-80               | 185.40                                            | 0.252                                             | 0.67                 |
